# Supplementary material
Source: MDPI journal article supplement (https://www.mdpi.com/2410-3888/7/4/211)
Supplement: s1 [file s1]

## Supplementary data

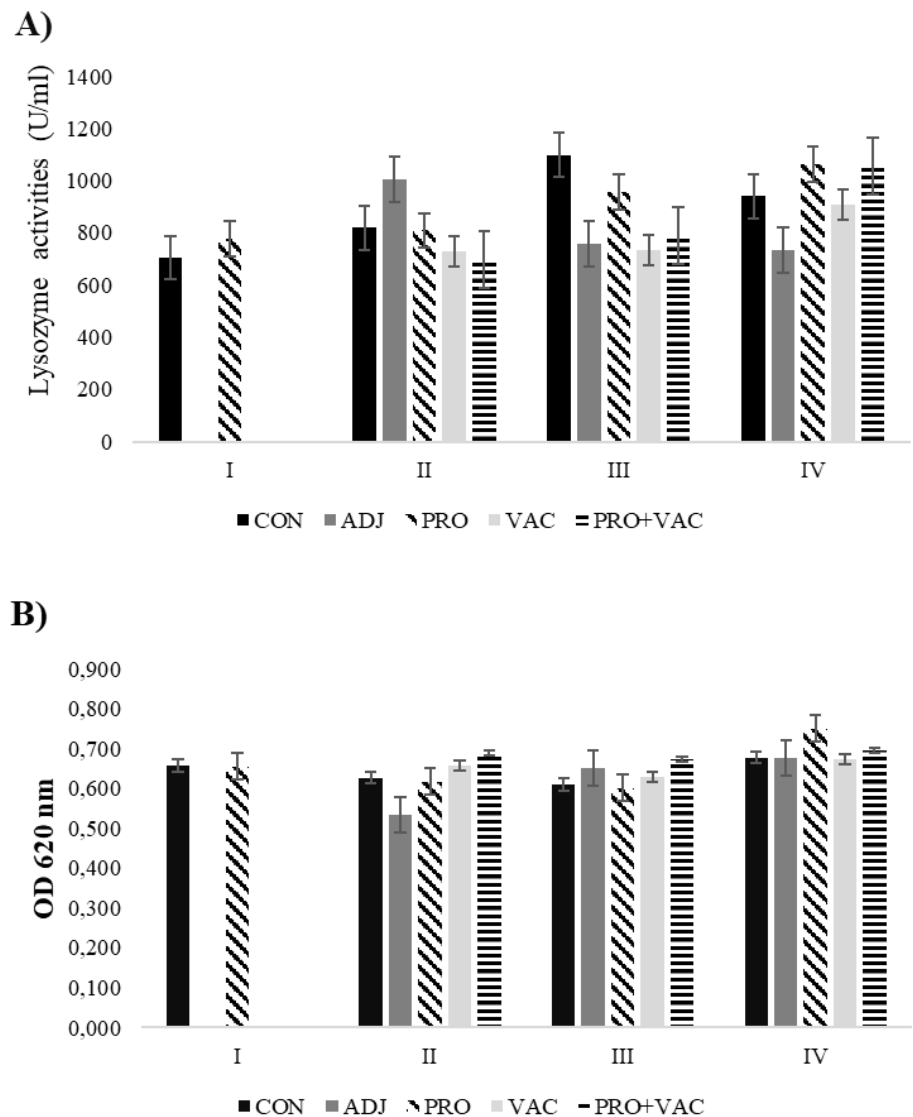

**Supplemental Figure S1** (A) Lysozyme activities and (B) Phagocyte respiratory burst of Nile tilapia, *O. niloticus*, at phases: [I] probiotic diet feeding [II], vaccination, [III] revaccination (booster) and [IV] survivors from 14 days post-infection (dpi) with *S. agalactiae* serotype Ib. (CON: control; ADJ: adjuvant; PRO: probiotics; VAC: vaccinated; PRO+VAC: probiotics + vaccine).

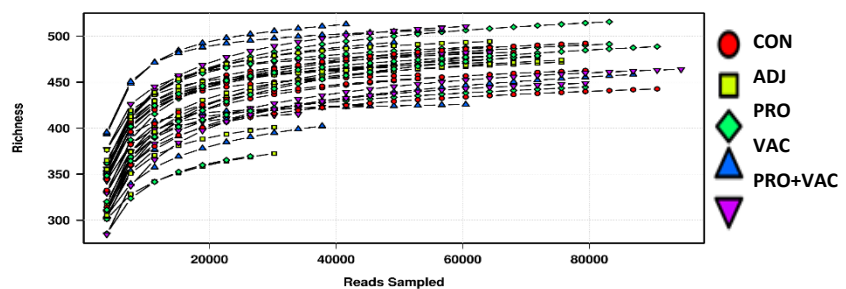

**Supplemental Figure S2.** Rarefaction curves of OTUs (operational taxonomic units), grouped in sequences with over 97% similarity, from gut

bacterial community of Nile tilapia (CON: control; ADJ: adjuvant; PRO: probiotics; VAC: vaccinated; PRO+VAC: probiotics + vaccine).
